# Supplementary material
Source: PubMed Central journal article supplement (PMC4443815)
Supplement: NIHMS687572-supplement-7.pdf [file NIHMS687572-supplement-7.pdf]

**Supplemental Table 1. List of ICS Gating Panel Participants**

| <b>Participant</b>        | <b>Organization</b>                                |
|---------------------------|----------------------------------------------------|
| Nathalie Cools            | Antwerp University Hospital                        |
| Nina Garlie               | Aurora St. Luke's Medical Center                   |
| Ricardo Pujol Borrell     | Autonomous University of Barcelona                 |
| Carlota Dobano            | Barcelona Centre for International Health Research |
| Gerlinde Obermoser        | Baylor Institute for Immunology Research           |
| Ryan Brinkman             | BC Cancer Agency                                   |
| John Webb                 | BC Cancer Agency                                   |
| Maria Jaimes              | BD Biosciences                                     |
| Ivana Durinovic-Bello     | Benaroya Research Institute                        |
| Fatema Legrand            | BN ImmunoTherapeutics                              |
| Reinhard Maier            | Cantonal Hospital St. Gallen                       |
| Zsuzsanna Tabi            | Cardiff University School of Medicine              |
| Susan Wong                | Cardiff University School of Medicine              |
| Maria Castro              | Cedars-Sinai Medical Center                        |
| Jim Ji                    | Cedars-Sinai Medical Center                        |
| Maha Ayyoub               | Centre de Lutte Contre le Cancer Nantes-Atlantique |
| Anne Letsch               | Charité - Berlin                                   |
| Carmen Scheibenbogen      | Charité - Berlin                                   |
| Erdyni Tsitsikov          | Children's Hospital Boston                         |
| Birgit Scheel             | CureVac                                            |
| Jacqueline Smith          | Dartmouth Medical School                           |
| Johnna Wesley             | Dendreon Corporation                               |
| Elizabeth Reap            | Duke University                                    |
| Cliburn Chan              | Duke University Medical Center                     |
| Janet Staats              | Duke University Medical Center                     |
| Barbara Menart-Houtermans | German Diabetes Center                             |
| Dmitry Gabrilovich        | H. Lee Moffitt Cancer Center                       |
| Mian Xu                   | H. Lee Moffitt Cancer Center                       |
| Julia Albrecht            | Helmholtz Zentrum Muenchen                         |
| Tanja Bauer               | Helmholtz Zentrum Muenchen                         |
| Judith Hosse              | Helmholtz Zentrum Muenchen                         |
| Anais Valencia            | Henry M. Jackson Foundation                        |
| Fang Zhao                 | Hospital of Essen University                       |
| Dominik Maurer            | Immatics                                           |
| Tina Jakobsen             | Immudex                                            |
| Jason Liu                 | Immune Tolerance Network                           |
| Dilbinder Gill            | Imperial College London, IAVI                      |
| Katy Rezvani              | Imperial College, Hammersmith Hospital             |
| Olivier Lantz             | Institut Curie                                     |
| Kimberly Shafer-Weaver    | Intrexon Corporation                               |
| Paola Filipazzi           | Istituto Nazionale Tumori                          |

|                        |                                                |
|------------------------|------------------------------------------------|
| Diana Stolle           | Johannes Gutenberg-University Mainz            |
| Sebastian Attig        | Johannes Gutenberg-University Mainz            |
| Hakim Echchannaoui     | Johannes Gutenberg-University Mainz            |
| Jili Chen              | John Radcliffe Hospital Oxford                 |
| Isabel Poschke         | Karolinska University Hospital                 |
| Sarah Thunberg         | Karolinska University Hospital                 |
| Eiichi Nakayama        | Kawasaki University of Medical Welfare         |
| Tim Tree               | King's College London School of Medicine       |
| Marij Welters          | Leiden University Medical Center               |
| Immanuel Luescher      | LICR Lausanne                                  |
| Olivier Michielin      | LICR Lausanne                                  |
| Petra Baumgartner      | LICR Lausanne                                  |
| Sacha Gnjatic          | LICR NY                                        |
| Steven Smith           | London School of Hygiene and Tropical Medicine |
| Sofie Pattijn          | Lonza Biologics plc.                           |
| Heike Pohla            | Ludwig-Maximilians-Universität München         |
| Corrado Cilio          | Lund University                                |
| Victor Tam             | MannKind Corp                                  |
| Dagmar Riemann         | Martin Luther University                       |
| Jonathan Bramson       | McMaster University                            |
| Krzysztof Giannopoulos | Medical University of Lublin                   |
| Anne Richter           | Miltenyi Biotec                                |
| Seunghee Kim-Schulze   | Mount Sinai School of Medicine                 |
| Humilidad Gallardo     | MSKCC                                          |
| Yuji Heike             | National Cancer Center Hospital Tokyo          |
| Pia Kvistborg          | Netherlands Cancer Institute                   |
| Donna Bryan            | NIBSC                                          |
| Diane Longo            | Nodality                                       |
| Jason Ptacek           | Nodality                                       |
| Hiroyoshi Nishikawa    | Osaka University                               |
| Jackie de Belin        | Oxford Biomedica                               |
| Eyad Elkord            | Paterson Institute for Cancer Research         |
| Marianne Martinic      | Pfizer                                         |
| Ghania Chikh           | Pfizer Canada                                  |
| Stacy Logan            | Pfizer Vaccines                                |
| Lisa McNeil            | Pfizer Vaccines                                |
| Kena Swanson           | Pfizer Vaccines                                |
| Magdalena Kovacsovics  | Providence Cancer Research Center              |
| Edwin Walker           | Providence Cancer Research Center              |
| Paola Nistico          | Regina Elena National Cancer Institute         |
| Quim Madrenas          | Robarts Research Institute                     |
| Kunle Odunsi           | Roswell Park                                   |
| Paul Wallace           | Roswell Park                                   |

|                                 |                                                  |
|---------------------------------|--------------------------------------------------|
| Matthieu Scotto                 | Saint Vincent de Paul Hospital                   |
| Martin Giedlin                  | Sangamo BioSciences                              |
| Anke Harenberg                  | sanofi pasteur                                   |
| Stuart Mannering                | St. Vincent's Institute of Medical Research      |
| Tony Lai                        | SUNY Upstate Medical University                  |
| Raija Ahmed                     | Swedish Institute for Infectious Disease Control |
| Valeria Judkowski               | Torrey Pines Institute for Molecular Studies     |
| Ronald Rooke                    | Transgene SA                                     |
| Begonya Comin-Anduix            | UCLA School of Medicine                          |
| Stefanie Gross                  | University Hospital Erlangen                     |
| Thomas Giese                    | University Hospital Heidelberg                   |
| Alexander Shimabukuro-Vornhagen | University Hospital of Cologne                   |
| Maries van den Broek            | University Hospital Zurich                       |
| Lisa Xu                         | University of British Columbia                   |
| Peter Gottlieb                  | University of Colorado, Denver                   |
| Christine Falk                  | University of Heidelberg                         |
| Evelyna Derhovanessian          | University of Heidelberg                         |
| Julie Curtsinger                | University of Minnesota, Masonic Cancer Center   |
| Dominique Gauchat               | University of Montreal                           |
| Dominike Sauvé                  | University of Montreal                           |
| James Talmadge                  | University of Nebraska Medical Center            |
| Iman Satti                      | University of Oxford                             |
| Michael Kalos                   | University of Pennsylvania                       |
| Lisa Butterfield                | University of Pittsburgh Medical Center          |
| Ruth Challis                    | University of Southampton                        |
| Cecile Gouttefangeas            | University of Tuebingen                          |
| Henning Zelba                   | University of Tuebingen                          |
| Walter Olson                    | University of Virginia                           |
| Jessica Reichow                 | Washington University                            |
| Jacquelyn Hank                  | University of Wisconsin-Madison                  |
| Doug McNeel                     | University of Wisconsin-Madison                  |
| Sandy Yoder                     | Vanderbilt University Medical Center             |
| Joanne Parker                   | ViraCor-IBT Laboratories                         |
| Tanja de Gruijl                 | VU University Medical Center                     |
| Fouzia Farooq                   | Walter Reed Army Research Institute (Navy)       |
| Lesley Devine                   | Yale University School of Medicine               |
| Valeria Judkowski               | Torrey Pines Institute for Molecular Studies     |
