# Supplementary material
Source: PubMed Central journal article supplement (PMC4443815)
Supplement: NIHMS687572-supplement-8.pdf [file NIHMS687572-supplement-8.pdf]

Supplemental Table 2. Questionnaire Responses – Lab Gating SOP

| Variable                                                                             |                                     | N  | %   |
|--------------------------------------------------------------------------------------|-------------------------------------|----|-----|
| Software Used for Data Analysis                                                      | FlowJo for Mac                      | 48 | 43% |
|                                                                                      | FlowJo for PC                       | 31 | 28% |
|                                                                                      | BD Diva                             | 18 | 16% |
|                                                                                      | Beckman-Coulter Kaluza              | 4  | 4%  |
|                                                                                      | Verity House                        | 3  | 3%  |
|                                                                                      | FCS Express                         | 2  | 2%  |
|                                                                                      | Weasel                              | 2  | 2%  |
|                                                                                      | Custom Software                     | 2  | 2%  |
|                                                                                      | Cyflogic                            | 1  | 1%  |
| Analysis Performed on                                                                | PC                                  | 60 | 54% |
|                                                                                      | Macintosh                           | 50 | 45% |
|                                                                                      | Linux                               | 1  | 1%  |
| Biexponential scale adjustment                                                       | Sometimes                           | 60 | 54% |
|                                                                                      | Never                               | 28 | 25% |
|                                                                                      | Always                              | 23 | 21% |
| Graphical Methods used to Visualize Data<br>(Labs could select more than one option) | Dot plots                           | 86 | 77% |
|                                                                                      | Histograms                          | 33 | 30% |
|                                                                                      | Contour plots                       | 31 | 28% |
|                                                                                      | Pseudo-color plots                  | 14 | 13% |
|                                                                                      | Density plots                       | 6  | 5%  |
|                                                                                      | Zebra plots                         | 5  | 5%  |
|                                                                                      | Not Specified                       | 4  | 4%  |
| Cell Population used for First Gate                                                  | Lymphocytes                         | 63 | 57% |
|                                                                                      | Singlets                            | 17 | 15% |
|                                                                                      | Dump                                | 13 | 12% |
|                                                                                      | Live Cells                          | 6  | 5%  |
|                                                                                      | CD3                                 | 5  | 5%  |
|                                                                                      | Time                                | 3  | 3%  |
|                                                                                      | Custom Software                     | 1  | 1%  |
|                                                                                      | Unknown                             | 3  | 3%  |
| Doublet Exclusion                                                                    | Always                              | 58 | 52% |
|                                                                                      | Sometimes                           | 35 | 32% |
|                                                                                      | Never                               | 18 | 16% |
| Gating Style                                                                         | Loose (Include Outliers)            | 73 | 66% |
|                                                                                      | Tight (Close to Central Population) | 38 | 34% |
| Lymphocyte Gate Type                                                                 | Freehand (polygon)                  | 93 | 84% |
|                                                                                      | Elliptical                          | 9  | 8%  |

|                                       |                                       |    |     |
|---------------------------------------|---------------------------------------|----|-----|
|                                       | Freehand (polygon) or Elliptical      | 4  | 4%  |
|                                       | Rectangular                           | 3  | 3%  |
|                                       | No Lymphocyte Gate Drawn              | 2  | 2%  |
| CD3+ Gate Drawn Versus                | Dump                                  | 25 | 23% |
|                                       | SSC                                   | 20 | 18% |
|                                       | CD4 and CD8                           | 12 | 11% |
|                                       | FSC                                   | 9  | 8%  |
|                                       | CD3 (histogram)                       | 8  | 7%  |
|                                       | Cytokine                              | 4  | 4%  |
|                                       | Dump or Live                          | 3  | 3%  |
|                                       | Dump or SSC                           | 3  | 3%  |
|                                       | SSC or FSC                            | 3  | 3%  |
|                                       | Live Cells                            | 2  | 2%  |
|                                       | Custom Software                       | 2  | 2%  |
|                                       | CD4 and CD8 or Dump                   | 1  | 1%  |
|                                       | CD4 or SSC                            | 1  | 1%  |
|                                       | Dump or cytokine                      | 1  | 1%  |
|                                       | Not specified                         | 17 | 15% |
| CD3+ Gate Type                        | Rectangular                           | 49 | 44% |
|                                       | Freehand (Polygon)                    | 41 | 37% |
|                                       | Quadrant                              | 8  | 7%  |
|                                       | Histogram                             | 6  | 5%  |
|                                       | Elliptical                            | 2  | 2%  |
|                                       | Other                                 | 5  | 5%  |
| CD3 Dim cells included                | Yes                                   | 82 | 74% |
|                                       | No                                    | 29 | 26% |
| CD4 and CD8 cells gated in Same Plot  | Yes, CD4 versus CD8                   | 67 | 60% |
|                                       | No, versus CD3                        | 21 | 19% |
|                                       | No, versus Cytokine                   | 5  | 5%  |
|                                       | No, Histogram                         | 3  | 3%  |
|                                       | No, Other (FCS, SSC, Software)        | 3  | 3%  |
|                                       | No, Not specified                     | 12 | 11% |
| CD4 / CD8 Gate Type                   | Rectangular                           | 48 | 43% |
|                                       | Freehand (Polygon)                    | 33 | 30% |
|                                       | Quadrant                              | 26 | 23% |
|                                       | Elliptical                            | 2  | 2%  |
|                                       | Other                                 | 2  | 2%  |
| CD4/CD8 Dim cells included            | Yes                                   | 84 | 76% |
|                                       | No                                    | 27 | 24% |
| Reason for including Dim cells (n=84) | Down-regulation of co-receptor        | 46 | 55% |
|                                       | Some Dim cells have Positive Response | 19 | 23% |

|                                                       |                                                 |    |     |
|-------------------------------------------------------|-------------------------------------------------|----|-----|
|                                                       | Gate Placement less arbitrary                   | 4  | 5%  |
|                                                       | Dim cells are T cells                           | 3  | 4%  |
|                                                       | Not specified                                   | 12 | 14% |
| Reason for excluding Dim cells<br>(n=27)              | Dim cells can be Myeloid cells                  | 11 | 41% |
|                                                       | Dim cells are Double Positive cells             | 4  | 15% |
|                                                       | No Dim Cells Present                            | 3  | 11% |
|                                                       | Dim cells put in Separate gate                  | 2  | 7%  |
|                                                       | Background                                      | 1  | 4%  |
|                                                       | No down-regulation                              | 1  | 4%  |
|                                                       | Not specified                                   | 5  | 19% |
| CD4+ CD8+ Double Positive<br>Cells Included in a Gate | Double Positives Excluded                       | 80 | 72% |
|                                                       | Double Positives in Separate Gate               | 10 | 9%  |
|                                                       | Included in Both CD4 and CD8 Gate               | 11 | 10% |
|                                                       | Included in CD4 Gate                            | 2  | 2%  |
|                                                       | Included in CD8 Gate                            | 3  | 3%  |
|                                                       | Included, Gate Not Specified                    | 5  | 5%  |
| Cytokine Positive Gate Drawn                          | Rectangular                                     | 54 | 49% |
|                                                       | Quadrant                                        | 38 | 34% |
|                                                       | Freehand (polygon)                              | 8  | 7%  |
|                                                       | Histogram                                       | 7  | 6%  |
|                                                       | Other                                           | 4  | 4%  |
| Distance of Gate from Cytokine<br>Negative Population | Somewhere in between Close and Far              | 47 | 42% |
|                                                       | Close to Negative Population                    | 41 | 37% |
|                                                       | Far Away from Negative Population               | 5  | 5%  |
|                                                       | Best Gate based on neg and pos controls         | 6  | 5%  |
|                                                       | FMO                                             | 3  | 3%  |
|                                                       | Isotype                                         | 3  | 3%  |
|                                                       | Backgating                                      | 2  | 2%  |
|                                                       | Compensation                                    | 1  | 1%  |
|                                                       | Dependent on Cytokine                           | 1  | 1%  |
|                                                       | Staining Intensity                              | 1  | 1%  |
|                                                       | Software                                        | 1  | 1%  |
| Backgating Used                                       | Sometimes                                       | 49 | 44% |
|                                                       | Yes                                             | 47 | 42% |
|                                                       | No                                              | 15 | 14% |
| Same Gates Used for all<br>Samples within a Donor     | Yes, for consistency / comparability of results | 73 | 66% |
|                                                       | Yes, reason not specified                       | 8  | 7%  |
|                                                       | No, due to changes based on stimulation         | 16 | 14% |
|                                                       | No, due to antibody variability                 | 2  | 2%  |
|                                                       | No, due to acquisition variability              | 1  | 1%  |
|                                                       | No, due to intra-assay variation                | 1  | 1%  |

|                                                                 |   |    |
|-----------------------------------------------------------------|---|----|
| No, reason not specified                                        | 3 | 3% |
| No, Change gates <i>between</i> donors due to donor variability | 7 | 6% |

---

## Phase II Questionnaire Responses – Comparison of SOPs

---

|                                    |                                            |    |     |
|------------------------------------|--------------------------------------------|----|-----|
| Greater confidence in results from | First time (Lab SOP)                       | 62 | 57% |
|                                    | Second time (Gating Strategy Instructions) | 47 | 43% |

---

|                                                                                              |                                      |     |     |
|----------------------------------------------------------------------------------------------|--------------------------------------|-----|-----|
| Reasons for greater confidence in Your SOP (N=62)<br>(Labs could state more than one reason) | Similar strategies                   | 14  | 23% |
|                                                                                              | Cytokine Proximity Better in own SOP | 8   | 13% |
|                                                                                              | First Gate on Lymphocytes            | 8   | 13% |
|                                                                                              | No inclusion of dims                 | 8   | 13% |
|                                                                                              | Did not do Dump vs CD3 Gate          | 5   | 8%  |
|                                                                                              | Include Double Positives             | 4   | 6%  |
|                                                                                              | Don't use uniform gates              | 3   | 5%  |
|                                                                                              | Time vs PE Gate                      | 2   | 3%  |
|                                                                                              | CD3 vs cytokines                     | 2   | 3%  |
|                                                                                              | All Steps of SOP                     | 1   | 2%  |
|                                                                                              | Backgating done in own SOP           | 1   | 2%  |
|                                                                                              | CD4 not vs CD8                       | 1   | 2%  |
|                                                                                              | Shape of gate                        | 1   | 2%  |
|                                                                                              | Software                             | 1   | 2%  |
| No FMO controls provided, in own SOP use FMO controls                                        | 4                                    | 6%  |     |
| Not Specified                                                                                | 8                                    | 13% |     |

---

|                                                                                                                  |                                                           |    |     |
|------------------------------------------------------------------------------------------------------------------|-----------------------------------------------------------|----|-----|
| Reasons for greater confidence in Gating Strategy Instructions (N=47)<br>(Labs could state more than one reason) | Dump vs CD3 Gate                                          | 21 | 45% |
|                                                                                                                  | Include Dim cells                                         | 9  | 19% |
|                                                                                                                  | Biexponential Scaling                                     | 8  | 17% |
|                                                                                                                  | CD4 vs CD8                                                | 5  | 11% |
|                                                                                                                  | Similar strategies                                        | 5  | 11% |
|                                                                                                                  | Cytokine Proximity Better in Gating Strategy Instructions | 4  | 9%  |
|                                                                                                                  | Lower background                                          | 1  | 2%  |
|                                                                                                                  | Exclude Double Positives                                  | 1  | 2%  |
|                                                                                                                  | No Histogram                                              | 1  | 2%  |
| Not Specified                                                                                                    | 1                                                         | 2% |     |

---

|                                               |     |    |     |
|-----------------------------------------------|-----|----|-----|
| SOP established for general gating procedures | Yes | 71 | 65% |
|                                               | No  | 38 | 35% |

---

|                                                                            |     |    |     |
|----------------------------------------------------------------------------|-----|----|-----|
| Established training protocol to teach new lab members how to analyze data | No  | 62 | 57% |
|                                                                            | Yes | 47 | 43% |

---

|                                |     |    |     |
|--------------------------------|-----|----|-----|
| Support publication of general | Yes | 98 | 90% |
|--------------------------------|-----|----|-----|

|                                                                                                                 |                                                                                                                          |    |     |
|-----------------------------------------------------------------------------------------------------------------|--------------------------------------------------------------------------------------------------------------------------|----|-----|
| harmonization guidelines for gating                                                                             | No                                                                                                                       | 11 | 10% |
| Lab would adopt published guidelines                                                                            | Yes                                                                                                                      | 94 | 86% |
| even if different from lab own procedure                                                                        | No                                                                                                                       | 15 | 14% |
| Experience of Scientist                                                                                         | 1 = Very Little Experience                                                                                               | 1  | 1%  |
|                                                                                                                 | 2                                                                                                                        | 0  | 0%  |
|                                                                                                                 | 3                                                                                                                        | 19 | 17% |
|                                                                                                                 | 4                                                                                                                        | 42 | 39% |
|                                                                                                                 | 5 = Very Experienced                                                                                                     | 47 | 43% |
| Number of years analyzing flow cytometry data                                                                   | 1 – 5                                                                                                                    | 28 | 26% |
|                                                                                                                 | 5.1 – 9.5                                                                                                                | 29 | 27% |
|                                                                                                                 | 10 – 19                                                                                                                  | 38 | 35% |
|                                                                                                                 | 20+                                                                                                                      | 14 | 13% |
| Ways personnel learned to gate and analyze complex flow cytometry data (Labs could select more than one option) | Training From Mentor                                                                                                     | 63 | 58% |
|                                                                                                                 | Learned On Own                                                                                                           | 60 | 55% |
|                                                                                                                 | Learned From Literature                                                                                                  | 59 | 54% |
|                                                                                                                 | Training From Others In Lab                                                                                              | 45 | 41% |
|                                                                                                                 | Formal Training (Class)                                                                                                  | 40 | 37% |
|                                                                                                                 | Web-Based Training                                                                                                       | 11 | 10% |
|                                                                                                                 | Other: Learn from Conferences / Seminars / Experts in the field / Publications / Software Tutorials / Proficiency Panels | 9  | 8%  |
| Number of personnel in lab with gating experience                                                               | 0                                                                                                                        | 2  | 2%  |
|                                                                                                                 | 1                                                                                                                        | 4  | 4%  |
|                                                                                                                 | 2                                                                                                                        | 15 | 14% |
|                                                                                                                 | 3                                                                                                                        | 15 | 14% |
|                                                                                                                 | 4                                                                                                                        | 22 | 20% |
|                                                                                                                 | 5                                                                                                                        | 19 | 17% |
|                                                                                                                 | 6 - 9                                                                                                                    | 17 | 16% |
|                                                                                                                 | 10 +                                                                                                                     | 12 | 11% |
|                                                                                                                 | Unknown                                                                                                                  | 3  | 3%  |
| Person performing proficiency testing also routinely performs sample testing                                    | Yes                                                                                                                      | 75 | 69% |
|                                                                                                                 | Sometimes                                                                                                                | 24 | 22% |
|                                                                                                                 | No                                                                                                                       | 10 | 9%  |
