# Supplementary material
Source: PubMed Central journal article supplement (PMC4443815)
Supplement: NIHMS687572-supplement-9.pdf [file NIHMS687572-supplement-9.pdf]

Supplemental Table 3: Results – % of Cytokine positive, CD4+/ CD8+ Cells

| CD+     | Reagent      | Donor | N    | Median | 25th Pctl | 75th Pctl | Mean | Standard Deviation | CV    | Min  | Max   | Phase |
|---------|--------------|-------|------|--------|-----------|-----------|------|--------------------|-------|------|-------|-------|
| CD4+    | Unstimulated | 1     | 111  | 0.03   | 0.01      | 0.07      | 0.08 | 0.2                | 263.6 | 0    | 1.74  | I     |
|         |              | 2     | 111  | 0.03   | 0.01      | 0.05      | 0.06 | 0.15               | 255.3 | 0    | 1.22  | I     |
|         |              | 3     | 111  | 0.03   | 0.01      | 0.06      | 0.06 | 0.13               | 207.2 | 0    | 1.01  | I     |
|         | CEF          | 1     | 111  | 0.05   | 0.02      | 0.1       | 0.12 | 0.31               | 253.6 | 0    | 2.51  | I     |
|         |              | 2     | 111  | 0.03   | 0.02      | 0.07      | 0.09 | 0.22               | 243.8 | 0    | 1.63  | I     |
|         |              | 3     | 111  | 0.05   | 0.02      | 0.07      | 0.07 | 0.12               | 167.9 | 0    | 0.89  | I     |
|         | CMVpp65      | 1     | 111  | 0.35   | 0.22      | 0.47      | 0.54 | 1.03               | 190.2 | 0.01 | 7.49  | I     |
|         |              | 2     | 111  | 0.03   | 0.01      | 0.07      | 0.09 | 0.25               | 289.0 | 0    | 2.07  | I     |
|         |              | 3     | 111  | 0.07   | 0.04      | 0.1       | 0.1  | 0.18               | 180.5 | 0    | 1.33  | I     |
| CD8+    | Unstimulated | 1     | 111  | 0.04   | 0.01      | 0.11      | 0.13 | 0.47               | 359.4 | 0    | 4.87  | I     |
|         |              | 2     | 111  | 0.05   | 0.03      | 0.1       | 0.11 | 0.27               | 240.3 | 0    | 2.57  | I     |
|         |              | 3     | 111  | 0.09   | 0.05      | 0.16      | 0.14 | 0.19               | 142.2 | 0    | 1.51  | I     |
|         | CEF          | 1     | 111  | 0.2    | 0.12      | 0.33      | 0.29 | 0.51               | 173.6 | 0.02 | 5.07  | I     |
|         |              | 2     | 111  | 0.8    | 0.7       | 0.88      | 0.8  | 0.37               | 46.8  | 0.05 | 3.2   | I     |
|         |              | 3     | 111  | 0.28   | 0.2       | 0.37      | 0.3  | 0.23               | 75.9  | 0.02 | 2.15  | I     |
|         | CMVpp65      | 1     | 111  | 0.24   | 0.15      | 0.39      | 0.49 | 1.22               | 247.1 | 0.02 | 10.51 | I     |
|         |              | 2     | 111  | 0.05   | 0.02      | 0.1       | 0.13 | 0.37               | 284.9 | 0    | 3.3   | I     |
|         |              | 3     | 111  | 0.2    | 0.13      | 0.27      | 0.25 | 0.28               | 114.0 | 0.02 | 2.45  | I     |
| CD4+    | Unstimulated | 1     | 109  | 0.02   | 0.02      | 0.04      | 0.03 | 0.02               | 60.4  | 0    | 0.08  | II    |
|         |              | 2     | 109  | 0.02   | 0.02      | 0.03      | 0.02 | 0.01               | 48.0  | 0    | 0.07  | II    |
|         |              | 3     | 109  | 0.02   | 0.01      | 0.03      | 0.02 | 0.02               | 70.4  | 0    | 0.09  | II    |
|         | CEF          | 1     | 109  | 0.04   | 0.03      | 0.05      | 0.05 | 0.04               | 95.3  | 0    | 0.45  | II    |
|         |              | 2     | 109  | 0.02   | 0.02      | 0.03      | 0.02 | 0.01               | 55.6  | 0    | 0.08  | II    |
|         |              | 3     | 109  | 0.04   | 0.03      | 0.04      | 0.04 | 0.01               | 37.2  | 0    | 0.07  | II    |
| CMVpp65 | 1            | 109   | 0.23 | 0.19   | 0.3       | 0.25      | 0.09 | 36.6               | 0.04  | 0.56 | II    |       |
|         | 2            | 109   | 0.02 | 0.02   | 0.03      | 0.03      | 0.01 | 59.1               | 0     | 0.09 | II    |       |

|      |              |   |     |      |      |      |      |      |       |      |      |    |
|------|--------------|---|-----|------|------|------|------|------|-------|------|------|----|
|      |              | 3 | 109 | 0.05 | 0.04 | 0.06 | 0.05 | 0.02 | 34.4  | 0    | 0.1  | II |
| CD8+ | Unstimulated | 1 | 109 | 0.03 | 0.02 | 0.04 | 0.04 | 0.04 | 101.7 | 0    | 0.31 | II |
|      |              | 2 | 109 | 0.03 | 0.03 | 0.05 | 0.05 | 0.08 | 164.4 | 0    | 0.82 | II |
|      |              | 3 | 109 | 0.06 | 0.05 | 0.09 | 0.08 | 0.07 | 91.6  | 0    | 0.62 | II |
|      | CEF          | 1 | 109 | 0.17 | 0.13 | 0.23 | 0.18 | 0.07 | 40.7  | 0.01 | 0.38 | II |
|      |              | 2 | 109 | 0.73 | 0.69 | 0.76 | 0.7  | 0.15 | 21.8  | 0    | 0.9  | II |
|      |              | 3 | 109 | 0.26 | 0.22 | 0.29 | 0.26 | 0.07 | 28.5  | 0    | 0.45 | II |
|      | CMVpp65      | 1 | 109 | 0.16 | 0.14 | 0.2  | 0.18 | 0.09 | 53.1  | 0.04 | 0.87 | II |
|      |              | 2 | 109 | 0.03 | 0.02 | 0.04 | 0.04 | 0.05 | 125.8 | 0    | 0.47 | II |
|      |              | 3 | 109 | 0.18 | 0.15 | 0.21 | 0.18 | 0.05 | 29.8  | 0    | 0.37 | II |
